# Supplementary material for: Thermal stable zinc-based hybrid halides with high external quantum efficiency as temperature detectors
Source: Royal Society of Chemistry journal article supplement (doi:10.1039/d2tc02838g), 2022-01-01
Supplement: d2tc02838g1.pdf [file d2tc02838g1.pdf]

## Supporting Information

### **Thermal Stable Zinc-Based Hybrid Halides with High External Quantum Efficiency as Temperature Detectors**

Xusheng Zhang,<sup>†</sup> Yan Xiong,<sup>‡</sup> Kunjie Liu,<sup>†</sup> Na Wang,<sup>†</sup> Liubing Fan,<sup>†</sup> Weiwei Li,<sup>‡</sup> Xiaobin Zhao,<sup>‡</sup> Jing Zhao,<sup>\*,†</sup> and Quanlin Liu<sup>\*,†</sup>

<sup>†</sup>The Beijing Municipal Key Laboratory of New Energy Materials and Technologies, School of Materials Sciences and Engineering, University of Science and Technology Beijing, Beijing 100083, China.

<sup>‡</sup>State Key Laboratory of HVDC (Electric Power Research Institute, China Southern Power Grid), Guangzhou 510663, Guangdong Province, China

**\*Corresponding Author:**

Email: 1. [jingzhao@ustb.edu.cn](mailto:jingzhao@ustb.edu.cn) 2. [qliu@ustb.edu.cn](mailto:qliu@ustb.edu.cn)

## CONTENTS

### 1. Tables

- Table S1** (Crystal data and structure refinement for  $(\text{C}_9\text{H}_{15}\text{N}_3)\text{ZnCl}_4$  at 293(2) K.) **S3**
- Table S2** (Atomic coordinates ( $\times 10^4$ ) and equivalent isotropic displacement parameters ( $\text{\AA}^2 \times 10^3$ ) for  $(\text{C}_9\text{H}_{15}\text{N}_3)\text{ZnCl}_4$  at 150.0 K with estimated standard deviations in parentheses.) **S3**
- Table S3** (Anisotropic displacement parameters ( $\text{\AA}^2 \times 10^3$ ) for  $(\text{C}_9\text{H}_{15}\text{N}_3)\text{ZnCl}_4$  at 150.0 K with estimated standard deviations in parentheses.) **S7**
- Table S4** (Bond lengths [ $\text{\AA}$ ] for  $(\text{C}_9\text{H}_{15}\text{N}_3)\text{ZnCl}_4$  at 150.0 K with estimated standard deviations in parentheses.) **S10**
- Table S5** (Bond angles [ $^\circ$ ] for  $(\text{C}_9\text{H}_{15}\text{N}_3)\text{ZnCl}_4$  at 150.0 K with estimated standard deviations in parentheses.) **S11**
- Table S6** (The manganese content for the metal components in the raw material and that obtained from EDS experiment.) **S13**
- Table S7** (CIE coordinates of  $(\text{C}_9\text{H}_{15}\text{N}_3)\text{ZnCl}_4:\text{Mn}^{2+}$  with different  $\text{Mn}^{2+}$  feed ratio (0~50%).) **S13**
- Table S8** (CIE coordinates of  $(\text{C}_9\text{H}_{15}\text{N}_3)\text{ZnCl}_4:5\%\text{Mn}^{2+}$  in the temperature range of 110 to 290 K) **S13**

### 2. Figures

- Figure S1** (SEM images of  $(\text{C}_9\text{H}_{15}\text{N}_3)_2\text{ZnCl}_4:\text{Mn}^{2+}$  (50%) and element mapping images of Zn, Mn, and Cl.) **S14**
- Figure S2** (The fluorescence decay lifetime of  $(\text{C}_9\text{H}_{15}\text{N}_3)\text{ZnCl}_4:\text{Mn}^{2+}$  with different  $\text{Mn}^{2+}$  feed ratio (1% ~ 50%) recorded at 405 and 523 nm at room temperature.) **S14**
- Figure S3** (The PL spectra of (a)  $(\text{C}_9\text{H}_{15}\text{N}_3)_2\text{ZnCl}_4$ , (b)  $(\text{C}_9\text{H}_{15}\text{N}_3)_2\text{ZnCl}_4:5\%\text{Mn}^{2+}$  and (c)  $(\text{C}_9\text{H}_{15}\text{N}_3)_2\text{ZnCl}_4:50\%\text{Mn}^{2+}$  with  $\text{Al}_2\text{O}_3$  as reference.) **S14**
- Figure S4** (The integrated PL intensity of  $(\text{C}_9\text{H}_{15}\text{N}_3)\text{ZnCl}_4$  in the range of 110 ~ 470 K

as a function of temperature.)

**S15**

**Table S1.** Crystal data and structure refinement for (C<sub>9</sub>H<sub>15</sub>N<sub>3</sub>)ZnCl<sub>4</sub> at 293(2) K.

|                                                     |                                                                                                                                                                   |
|-----------------------------------------------------|-------------------------------------------------------------------------------------------------------------------------------------------------------------------|
| Empirical formula                                   | (C <sub>9</sub> H <sub>15</sub> N <sub>3</sub> )ZnCl <sub>4</sub>                                                                                                 |
| Formula weight                                      | 1111.17                                                                                                                                                           |
| Temperature                                         | 150.0 K                                                                                                                                                           |
| Crystal system                                      | monoclinic                                                                                                                                                        |
| Space group                                         | <i>P2</i> <sub>1</sub>                                                                                                                                            |
| Unit-cell dimensions                                | $a = 10.350(2) \text{ \AA}$ , $\alpha = 90^\circ$<br>$b = 20.076(4) \text{ \AA}$ , $\beta = 91.748(7)^\circ$<br>$c = 20.679(4) \text{ \AA}$ , $\gamma = 90^\circ$ |
| Volume                                              | 4294.9(14) Å <sup>3</sup>                                                                                                                                         |
| <i>Z</i>                                            | 4                                                                                                                                                                 |
| Density (calculated)                                | 1.718 g/cm <sup>3</sup>                                                                                                                                           |
| Absorption coefficient                              | 2.422 mm <sup>-1</sup>                                                                                                                                            |
| <i>F</i> (000)                                      | 2236                                                                                                                                                              |
| $\theta$ range for data collection                  | 1.969 to 24.999°                                                                                                                                                  |
| Index ranges                                        | $-12 \leq h \leq 12$ , $-23 \leq k \leq 23$ , $-24 \leq l \leq 24$                                                                                                |
| Reflections collected                               | 60098                                                                                                                                                             |
| Independent reflections                             | 14944 [ <i>R</i> <sub>int</sub> = 0.0754]                                                                                                                         |
| Completeness to $\theta = 25.242^\circ$             | 98.8%                                                                                                                                                             |
| Refinement method                                   | Full-matrix least-squares on <i>F</i> <sup>2</sup>                                                                                                                |
| Data/restraints/parameters                          | 14944/37/953                                                                                                                                                      |
| Goodness-of-fit                                     | 1.076                                                                                                                                                             |
| Final <i>R</i> indices [ <i>I</i> > 2σ( <i>I</i> )] | <i>R</i> <sub>obs</sub> = 0.0588, <i>wR</i> <sub>obs</sub> = 0.1488                                                                                               |
| <i>R</i> indices [all data]                         | <i>R</i> <sub>all</sub> = 0.0774, <i>wR</i> <sub>all</sub> = 0.1615                                                                                               |
| Largest diff. peak and hole                         | 0.617 and -0.693 e <sup>-</sup> Å <sup>-3</sup>                                                                                                                   |

$$R = \frac{\sum ||F_o| - |F_c||}{\sum |F_o|}, wR = \left\{ \frac{\sum [w(|F_o|^2 - |F_c|^2)^2]}{\sum [w(|F_o|^4)]} \right\}^{1/2} \text{ and } w = 1/[\sigma^2(F_o^2) + (0.0778P)^2 + 2.7836P] \text{ where } P = (F_o^2 + 2F_c^2)/3$$

**Table S2.** Atomic coordinates ( $\times 10^4$ ) and equivalent isotropic displacement parameters ( $\text{\AA}^2 \times 10^3$ ) for (C<sub>9</sub>H<sub>15</sub>N<sub>3</sub>)ZnCl<sub>4</sub> at 150.0 K with estimated standard deviations in parentheses.

| Label  | x        | y       | z       | Occupancy | U <sub>eq</sub> * |
|--------|----------|---------|---------|-----------|-------------------|
| Zn(02) | 6590(2)  | 7010(1) | 7131(1) | 1         | 36(1)             |
| Zn(03) | 10520(2) | 7060(1) | 486(1)  | 1         | 45(1)             |
| Zn(04) | 6428(8)  | 4961(2) | 1177(3) | 0.69(2)   | 31(2)             |
| Zn(05) | 9662(10) | 4966(9) | 4533(7) | 0.423(17) | 33(2)             |
| Zn(06) | 4058(10) | 7046(6) | 3846(5) | 0.548(16) | 40(2)             |

|        |           |          |         |           |       |
|--------|-----------|----------|---------|-----------|-------|
| CI(07) | 8431(3)   | 10881(2) | 1871(2) | 1         | 40(1) |
| CI(08) | 5212(3)   | 10076(2) | 2062(2) | 1         | 39(1) |
| CI(09) | 8071(3)   | 9064(2)  | 1560(2) | 1         | 44(1) |
| CI(0A) | 4436(3)   | 6829(2)  | 7023(2) | 1         | 42(1) |
| CI(0B) | 7819(4)   | 9776(2)  | 3245(2) | 1         | 55(1) |
| CI(0C) | 8326(4)   | 6903(2)  | 401(2)  | 1         | 47(1) |
| CI(0D) | 7185(3)   | 6974(2)  | 8210(2) | 1         | 46(1) |
| CI(0E) | 9227(5)   | 4003(2)  | 4957(2) | 1         | 66(2) |
| CI(0F) | 5754(17)  | 4071(5)  | 1723(5) | 0.70(4)   | 44(3) |
| CI(0G) | 5909(3)   | 4912(2)  | 120(2)  | 1         | 53(1) |
| CI(0H) | 12005(4)  | 5151(2)  | 4652(2) | 1         | 53(1) |
| CI(0I) | 8722(4)   | 5128(2)  | 1292(2) | 1         | 51(1) |
| CI(0J) | 7258(4)   | 7948(2)  | 6683(2) | 1         | 51(1) |
| CI(0K) | 11183(4)  | 7901(2)  | -114(2) | 1         | 52(1) |
| CI(0L) | 11535(4)  | 6092(2)  | 202(2)  | 1         | 49(1) |
| CI(0M) | 9449(4)   | 5005(2)  | 3447(2) | 1         | 57(1) |
| CI(0N) | 1762(4)   | 6886(2)  | 3704(2) | 1         | 59(2) |
| CI(0O) | 5353(15)  | 5921(4)  | 1495(7) | 0.63(6)   | 38(3) |
| CI(0P) | 8778(5)   | 5810(3)  | 4990(3) | 1         | 81(2) |
| CI(0Q) | 7716(16)  | 6102(8)  | 6770(8) | 0.56(2)   | 45(2) |
| CI(0R) | 11073(4)  | 7179(3)  | 1567(2) | 1         | 63(2) |
| CI(0S) | 4757(8)   | 7878(3)  | 3248(4) | 0.655(16) | 46(2) |
| CI(0T) | 4664(15)  | 6184(6)  | 3328(7) | 0.346(13) | 48(2) |
| CI(0U) | 4198(4)   | 7064(3)  | 4918(2) | 1         | 84(2) |
| N(00V) | 4753(11)  | 10229(7) | 3618(6) | 1         | 44(3) |
| N(00W) | 12318(13) | 5372(8)  | 3095(6) | 1         | 55(4) |
| C(00X) | 10669(12) | 7627(8)  | 7005(7) | 1         | 37(2) |
| N(00Y) | 11217(12) | 10307(8) | 270(7)  | 1         | 61(4) |
| C(00Z) | 4351(11)  | 7554(7)  | 1545(7) | 1         | 39(3) |
| N(010) | 10548(10) | 7290(6)  | 7574(6) | 1         | 37(2) |
| C(011) | 11308(13) | 9291(8)  | 904(7)  | 1         | 40(3) |
| N(012) | 11380(11) | 9629(6)  | 1499(6) | 1         | 41(3) |
| C(013) | 4499(12)  | 7602(6)  | 375(7)  | 1         | 34(3) |
| C(014) | 4333(15)  | 6225(9)  | -779(8) | 1         | 52(4) |

|        |           |           |          |   |       |
|--------|-----------|-----------|----------|---|-------|
| C(015) | 10558(12) | 7597(8)   | 8189(7)  | 1 | 37(2) |
| C(016) | 11338(12) | 8679(6)   | 2178(7)  | 1 | 32(3) |
| C(017) | 12234(13) | 3352(7)   | 733(7)   | 1 | 46(3) |
| C(32)  | 12371(14) | 3651(7)   | 1300(8)  | 1 | 48(4) |
| N(01A) | 12542(12) | 4711(6)   | 1893(6)  | 1 | 40(3) |
| C(01C) | 7287(14)  | 7541(8)   | 4921(7)  | 1 | 46(3) |
| C(01D) | 11948(15) | 10346(9)  | 1442(7)  | 1 | 56(4) |
| N(01E) | 10718(11) | 7282(6)   | 6479(5)  | 1 | 39(3) |
| N(01F) | 4364(13)  | 7272(8)   | 936(7)   | 1 | 57(4) |
| C(01G) | 10994(14) | 6566(7)   | 6427(7)  | 1 | 39(3) |
| N(01H) | 4501(11)  | 7256(6)   | -185(6)  | 1 | 37(3) |
| C(01K) | 12370(12) | 3741(8)   | 141(7)   | 1 | 42(3) |
| C(01L) | 3721(14)  | 7246(8)   | -1335(8) | 1 | 49(4) |
| H01N() | 3752.33   | 7481.98   | -1755.03 | 1 | 59    |
| C(01M) | 5354(14)  | 10541(9)  | 4221(6)  | 1 | 47(4) |
| N(01N) | 4385(14)  | 9616(7)   | 4823(7)  | 1 | 65(4) |
| C(01O) | 11275(15) | 8399(8)   | 2738(9)  | 1 | 57(5) |
| N(30)  | 11164(12) | 9755(7)   | 2632(6)  | 1 | 50(3) |
| C(01Q) | 4487(12)  | 8238(8)   | 1585(7)  | 1 | 45(4) |
| C(01R) | 4420(20)  | 9570(10)  | 3666(8)  | 1 | 63(5) |
| C(01S) | 7494(14)  | 7239(8)   | 4326(7)  | 1 | 46(4) |
| N(32)  | 12540(11) | 4698(6)   | 744(5)   | 1 | 40(3) |
| C(01U) | 10699(12) | 8314(7)   | 8196(7)  | 1 | 37(2) |
| C(01V) | 11771(14) | 6416(8)   | 5882(8)  | 1 | 52(4) |
| C(01W) | 11001(17) | 7410(9)   | 5293(8)  | 1 | 57(5) |
| C(01X) | 7310(15)  | 8240(10)  | 4986(9)  | 1 | 61(4) |
| C(01Z) | 10130(15) | 7550(9)   | 5853(7)  | 1 | 55(4) |
| N(020) | 7832(13)  | 8286(7)   | 3856(6)  | 1 | 57(4) |
| C(021) | 11305(11) | 9356(9)   | 2086(7)  | 1 | 42(4) |
| C(022) | 4619(12)  | 8279(7)   | 435(7)   | 1 | 37(3) |
| C(023) | 4989(14)  | 6612(7)   | -271(6)  | 1 | 39(3) |
| C(025) | 11063(15) | 8778(8)   | 3298(8)  | 1 | 52(4) |
| C(026) | 4502(19)  | 10384(10) | 4822(8)  | 1 | 69(5) |
| C(027) | 10731(12) | 8311(7)   | 7047(7)  | 1 | 37(2) |

|        |           |          |          |           |        |
|--------|-----------|----------|----------|-----------|--------|
| N(029) | 4323(9)   | 6585(5)  | -1395(5) | 1         | 28(2)  |
| C(02A) | 10591(14) | 9676(8)  | 383(7)   | 1         | 42(3)  |
| C(02B) | 3710(20)  | 9386(11) | 4245(8)  | 1         | 80(6)  |
| C(02C) | 11195(14) | 10739(8) | 884(6)   | 1         | 39(3)  |
| C(02D) | 12513(12) | 4365(8)  | 187(6)   | 1         | 41(3)  |
| C(0)   | 12380(20) | 4350(11) | 2479(10) | 0.53(2)   | 31(4)  |
| C(02F) | 4596(12)  | 8603(8)  | 1043(7)  | 1         | 42(4)  |
| C(02H) | 7596(15)  | 8604(9)  | 4435(7)  | 1         | 59(4)  |
| C(02I) | 12110(20) | 5443(9)  | 1883(8)  | 1         | 73(6)  |
| C(02J) | 10772(12) | 8651(8)  | 7628(6)  | 1         | 37(2)  |
| N(02L) | 11214(12) | 6643(6)  | 5269(6)  | 1         | 46(3)  |
| C02N() | 4395(18)  | 7644(9)  | -831(8)  | 1         | 59(4)  |
| C(02O) | 10986(17) | 9458(10) | 3219(8)  | 1         | 64(5)  |
| C(02Q) | 12525(13) | 4373(8)  | 1315(7)  | 1         | 41(3)  |
| C(2B)  | 12510(30) | 4635(13) | 3051(14) | 0.52(3)   | 29(5)  |
| C(4)   | 13260(20) | 4502(12) | 2480(11) | 0.47(2)   | 31(4)  |
| C(1)   | 11610(30) | 5620(15) | 2454(12) | 0.376(18) | 27(3)  |
| Cl(1)  | 5780(40)  | 5825(13) | 1740(30) | 0.40(6)   | 63(10) |
| Zn(8)  | 7396(2)   | 9915(1)  | 2165(1)  | 1         | 33(1)  |
| Zn(2)  | 6792(13)  | 4936(6)  | 1270(6)  | 0.29(2)   | 31(2)  |
| Zn(1)  | 3639(10)  | 7021(8)  | 3820(7)  | 0.425(15) | 40(2)  |
| Zn(0A) | 10053(11) | 4955(6)  | 4514(5)  | 0.540(17) | 33(2)  |
| Cl(1A) | 4278(16)  | 7974(7)  | 3409(8)  | 0.333(14) | 46(2)  |
| Cl(2A) | 7550(20)  | 6194(10) | 6561(9)  | 0.47(2)   | 45(2)  |
| Cl(2)  | 6180(30)  | 3979(12) | 1708(13) | 0.30(4)   | 44(3)  |
| Cl(3)  | 5074(8)   | 6095(3)  | 3553(4)  | 0.643(14) | 48(2)  |
| C(3AA) | 3821(14)  | 9382(10) | 6498(8)  | 1         | 54(4)  |
| C(1AA) | 3896(13)  | 8739(8)  | 6583(7)  | 1         | 45(3)  |
| C(0AA) | 4027(14)  | 8357(8)  | 6047(9)  | 1         | 57(4)  |
| N(0AA) | 4153(13)  | 8639(8)  | 5475(8)  | 1         | 76(5)  |
| C(5)   | 3951(12)  | 9690(8)  | 5959(6)  | 1         | 37(3)  |
| C(6)   | 4100(13)  | 9344(9)  | 5416(7)  | 1         | 49(3)  |
| N(1)   | 8107(10)  | 6696(5)  | 1967(5)  | 1         | 31(2)  |
| N(2AA) | 8014(13)  | 7315(6)  | 3205(5)  | 1         | 44(3)  |

|        |           |          |          |           |       |
|--------|-----------|----------|----------|-----------|-------|
| C(3)   | 7786(14)  | 7600(7)  | 3791(7)  | 1         | 45(3) |
| C(5AA) | 8090(30)  | 7747(13) | 2610(12) | 0.57(2)   | 51(5) |
| C(4AA) | 7690(20)  | 7449(10) | 2043(9)  | 1         | 87(8) |
| C(6AA) | 8030(40)  | 6297(14) | 2580(13) | 0.57(3)   | 64(4) |
| C(7)   | 8317(19)  | 6658(7)  | 3113(8)  | 1         | 64(4) |
| C(8)   | 8850(50)  | 6520(16) | 2558(15) | 0.47(3)   | 64(4) |
| C(9)   | 7210(40)  | 7660(16) | 2592(15) | 0.45(2)   | 51(5) |
| C(10)  | 12562(17) | 5796(9)  | 2462(7)  | 0.624(18) | 27(3) |
| C(2A)  | 13140(30) | 4746(13) | 2994(13) | 0.48(3)   | 29(5) |

\* $U_{eq}$  is defined as one third of the trace of the orthogonalized  $U_{ij}$  tensor.

**Table S3.** Anisotropic displacement parameters ( $\text{\AA}^2 \times 10^3$ ) for  $(\text{C}_9\text{H}_{15}\text{N}_3)\text{ZnCl}_4$  at 150.0 K with estimated standard deviations in parentheses.

| Label  | $U_{11}$ | $U_{22}$ | $U_{33}$ | $U_{12}$ | $U_{13}$ | $U_{23}$ |
|--------|----------|----------|----------|----------|----------|----------|
| Zn(02) | 33(1)    | 36(1)    | 39(1)    | -1(1)    | 3(1)     | 0(1)     |
| Zn(03) | 61(1)    | 37(1)    | 36(1)    | 5(1)     | 0(1)     | -1(1)    |
| Zn(04) | 39(3)    | 31(1)    | 23(2)    | 7(2)     | -8(2)    | 3(1)     |
| Zn(05) | 34(4)    | 29(1)    | 37(2)    | -3(4)    | 6(3)     | 0(1)     |
| Zn(06) | 45(4)    | 40(2)    | 34(2)    | 5(4)     | -5(3)    | -2(1)    |
| Cl(07) | 38(2)    | 38(2)    | 45(2)    | -7(2)    | 10(2)    | -2(2)    |
| Cl(08) | 30(2)    | 46(2)    | 40(2)    | -3(2)    | 1(2)     | -4(2)    |
| Cl(09) | 45(2)    | 37(2)    | 51(2)    | 2(2)     | 6(2)     | -8(2)    |
| Cl(0A) | 33(2)    | 55(2)    | 38(2)    | -2(2)    | -2(2)    | 0(2)     |
| Cl(0B) | 57(2)    | 76(3)    | 34(2)    | -4(2)    | 0(2)     | 7(2)     |
| Cl(0C) | 63(2)    | 43(2)    | 36(2)    | 2(2)     | -1(2)    | -2(2)    |
| Cl(0D) | 37(2)    | 53(2)    | 47(2)    | 4(2)     | -6(2)    | 8(2)     |
| Cl(0E) | 96(3)    | 43(2)    | 58(2)    | -17(2)   | -4(2)    | 9(2)     |
| Cl(0F) | 47(7)    | 32(3)    | 52(2)    | -1(4)    | -17(4)   | 13(2)    |
| Cl(0G) | 48(2)    | 73(2)    | 38(2)    | 13(2)    | 4(2)     | 7(2)     |
| Cl(0H) | 84(2)    | 40(2)    | 36(2)    | 0(2)     | -5(2)    | 0(2)     |
| Cl(0I) | 70(2)    | 47(2)    | 36(2)    | -2(2)    | 2(2)     | 6(2)     |
| Cl(0J) | 50(2)    | 43(2)    | 60(2)    | -6(2)    | 11(2)    | 6(2)     |
| Cl(0K) | 71(2)    | 39(2)    | 47(2)    | -5(2)    | -1(2)    | -1(2)    |
| Cl(0L) | 64(2)    | 36(2)    | 47(2)    | 5(2)     | 11(2)    | 5(2)     |
| Cl(0M) | 78(2)    | 53(2)    | 39(2)    | -6(2)    | -14(2)   | 4(2)     |
| Cl(0N) | 99(3)    | 41(2)    | 37(2)    | 12(2)    | 9(2)     | -1(2)    |
| Cl(0O) | 43(4)    | 38(3)    | 31(5)    | 5(3)     | -2(4)    | 0(3)     |



|        |        |        |        |        |        |        |
|--------|--------|--------|--------|--------|--------|--------|
| Cl(OP) | 68(3)  | 72(3)  | 104(4) | -18(2) | 24(2)  | -38(3) |
| Cl(OQ) | 47(4)  | 34(5)  | 55(8)  | 12(3)  | 7(5)   | 1(5)   |
| Cl(OR) | 65(2)  | 87(3)  | 37(2)  | 17(2)  | -16(2) | -5(2)  |
| Cl(OS) | 56(5)  | 34(3)  | 47(4)  | 4(3)   | 2(3)   | -1(2)  |
| Cl(OT) | 69(5)  | 33(3)  | 42(4)  | 6(3)   | 12(3)  | 11(3)  |
| Cl(OU) | 70(3)  | 138(5) | 43(2)  | 44(3)  | 0(2)   | 8(3)   |
| N(00V) | 36(6)  | 62(9)  | 35(6)  | -4(5)  | -1(4)  | -13(6) |
| N(00W) | 54(7)  | 81(10) | 29(6)  | 15(7)  | -8(5)  | 12(6)  |
| C(00X) | 38(2)  | 38(3)  | 34(2)  | 9(2)   | -6(2)  | -2(2)  |
| N(00Y) | 42(7)  | 92(11) | 51(8)  | -10(7) | 4(5)   | -23(7) |
| C(00Z) | 31(6)  | 37(7)  | 49(8)  | -3(5)  | -2(5)  | -13(6) |
| N(010) | 38(2)  | 38(3)  | 34(2)  | 9(2)   | -6(2)  | -2(2)  |
| C(011) | 43(7)  | 38(7)  | 40(7)  | -6(5)  | 5(5)   | -6(6)  |
| N(012) | 37(6)  | 44(7)  | 42(7)  | -10(5) | 4(5)   | -9(5)  |
| C(013) | 37(6)  | 21(6)  | 44(7)  | -6(5)  | 3(5)   | -18(5) |
| C(014) | 50(8)  | 45(9)  | 61(10) | 12(7)  | 9(7)   | 1(8)   |
| C(015) | 38(2)  | 38(3)  | 34(2)  | 9(2)   | -6(2)  | -2(2)  |
| C(016) | 36(6)  | 15(6)  | 46(8)  | 8(5)   | -9(5)  | 1(5)   |
| C(017) | 60(8)  | 25(6)  | 53(8)  | 1(6)   | 12(6)  | -13(6) |
| C(32)  | 66(9)  | 25(6)  | 54(8)  | 0(6)   | 22(7)  | 15(5)  |
| N(01A) | 63(7)  | 26(6)  | 30(6)  | 14(5)  | 0(5)   | -4(4)  |
| C(01C) | 68(9)  | 41(8)  | 30(7)  | -9(6)  | 0(6)   | 8(6)   |
| C(01D) | 56(8)  | 69(10) | 41(8)  | -32(7) | -16(6) | 15(7)  |
| N(01E) | 45(6)  | 50(7)  | 22(5)  | 6(5)   | 8(4)   | 6(5)   |
| N(01F) | 55(7)  | 46(8)  | 68(10) | -3(6)  | -2(6)  | 0(7)   |
| C(01G) | 59(8)  | 27(7)  | 32(7)  | 24(6)  | -9(6)  | 10(5)  |
| N(01H) | 52(6)  | 24(5)  | 35(6)  | 0(4)   | 11(5)  | 7(4)   |
| C(01K) | 43(7)  | 46(8)  | 39(7)  | 13(6)  | 8(5)   | -8(6)  |
| C(01L) | 47(8)  | 49(9)  | 51(9)  | 8(6)   | -13(6) | 5(7)   |
| C(01M) | 56(8)  | 60(9)  | 26(6)  | -18(7) | 2(5)   | 11(6)  |
| N(01N) | 93(10) | 46(7)  | 57(8)  | -52(7) | 19(7)  | -9(6)  |
| C(01O) | 64(9)  | 29(7)  | 77(12) | 5(6)   | -30(8) | 5(8)   |
| N(30)  | 58(7)  | 40(7)  | 52(8)  | 6(5)   | -10(5) | 9(6)   |
| C(01Q) | 29(6)  | 61(10) | 45(8)  | -15(6) | -4(5)  | -16(7) |
| C(01R) | 93(13) | 57(11) | 38(9)  | -36(9) | 2(8)   | 7(8)   |
| C(01S) | 67(9)  | 30(7)  | 43(8)  | -1(6)  | 8(6)   | 5(6)   |
| N(32)  | 51(6)  | 42(6)  | 27(5)  | -9(5)  | -3(4)  | 0(4)   |
| C(01U) | 38(2)  | 38(3)  | 34(2)  | 9(2)   | -6(2)  | -2(2)  |

|        |         |        |        |         |        |         |
|--------|---------|--------|--------|---------|--------|---------|
| C(01V) | 48(8)   | 46(8)  | 60(9)  | 17(6)   | -8(6)  | -5(7)   |
| C(01W) | 61(9)   | 67(11) | 44(9)  | 28(8)   | 2(7)   | 14(8)   |
| C(01X) | 58(9)   | 68(11) | 56(10) | 7(8)    | -2(7)  | -6(8)   |
| C(01Z) | 64(9)   | 60(10) | 40(8)  | 32(7)   | -3(6)  | 16(7)   |
| N(020) | 89(9)   | 53(8)  | 30(6)  | -12(7)  | 4(6)   | -11(6)  |
| C(021) | 24(6)   | 71(10) | 32(7)  | -3(6)   | 0(5)   | -18(7)  |
| C(022) | 29(6)   | 39(8)  | 44(8)  | -6(5)   | 8(5)   | -12(6)  |
| C(023) | 51(7)   | 32(7)  | 33(7)  | 7(5)    | -9(5)  | 3(5)    |
| C(025) | 68(9)   | 47(8)  | 41(8)  | -13(7)  | -6(7)  | 7(7)    |
| C(026) | 100(13) | 73(12) | 36(8)  | -17(10) | 19(8)  | 3(8)    |
| C(027) | 38(2)   | 38(3)  | 34(2)  | 9(2)    | -6(2)  | -2(2)   |
| N(029) | 34(5)   | 19(5)  | 31(5)  | 4(4)    | 9(4)   | -12(4)  |
| C(02A) | 52(7)   | 44(8)  | 32(7)  | -11(6)  | 12(5)  | -10(6)  |
| C(02B) | 104(14) | 90(14) | 47(9)  | -59(11) | 20(8)  | -1(9)   |
| C(02C) | 49(7)   | 41(8)  | 26(6)  | -1(6)   | 1(5)   | -1(5)   |
| C(02D) | 40(7)   | 56(8)  | 29(6)  | 0(6)    | 13(5)  | 11(6)   |
| C(0)   | 41(9)   | 23(8)  | 30(8)  | -3(7)   | -2(8)  | -5(7)   |
| C(02F) | 29(6)   | 50(9)  | 47(8)  | -1(5)   | -2(5)  | -17(7)  |
| C(02H) | 73(10)  | 62(10) | 42(8)  | -10(8)  | 6(7)   | -15(7)  |
| C(02I) | 133(17) | 46(9)  | 38(9)  | -3(10)  | -4(9)  | -14(7)  |
| C(02J) | 38(2)   | 38(3)  | 34(2)  | 9(2)    | -6(2)  | -2(2)   |
| N(02L) | 69(8)   | 28(6)  | 40(7)  | 23(5)   | 4(5)   | -17(5)  |
| C(02N) | 83(11)  | 45(9)  | 47(9)  | 6(8)    | 8(7)   | 6(7)    |
| C(02O) | 80(11)  | 78(12) | 33(8)  | -8(9)   | -8(7)  | -12(8)  |
| C(02Q) | 40(7)   | 44(7)  | 40(7)  | 5(5)    | 8(5)   | 8(5)    |
| C(2B)  | 38(14)  | 21(9)  | 28(8)  | 3(10)   | 3(11)  | 8(7)    |
| C(4)   | 41(9)   | 23(8)  | 30(8)  | -3(7)   | -2(8)  | -5(7)   |
| C(1)   | 45(8)   | 28(8)  | 8(6)   | -5(6)   | -4(6)  | 1(5)    |
| Cl(1)  | 60(13)  | 54(7)  | 76(19) | -13(8)  | 30(14) | -18(10) |
| Zn(8)  | 34(1)   | 34(1)  | 31(1)  | -4(1)   | 3(1)   | -1(1)   |
| Zn(2)  | 39(3)   | 31(1)  | 23(2)  | 7(2)    | -8(2)  | 3(1)    |
| Zn(1)  | 45(4)   | 40(2)  | 34(2)  | 5(4)    | -5(3)  | -2(1)   |
| Zn(0A) | 34(4)   | 29(1)  | 37(2)  | -3(4)   | 6(3)   | 0(1)    |
| Cl(1A) | 56(5)   | 34(3)  | 47(4)  | 4(3)    | 2(3)   | -1(2)   |
| Cl(2A) | 47(4)   | 34(5)  | 55(8)  | 12(3)   | 7(5)   | 1(5)    |
| Cl(2)  | 47(7)   | 32(3)  | 52(2)  | -1(4)   | -17(4) | 13(2)   |
| Cl(3)  | 69(5)   | 33(3)  | 42(4)  | 6(3)    | 12(3)  | 11(3)   |
| C(3AA) | 34(7)   | 85(11) | 45(8)  | 5(7)    | 1(5)   | -1(7)   |

|        |         |        |         |        |         |        |
|--------|---------|--------|---------|--------|---------|--------|
| C(1AA) | 51(8)   | 51(9)  | 34(7)   | 16(6)  | -1(5)   | 7(6)   |
| C(0AA) | 47(8)   | 29(7)  | 96(13)  | -9(6)  | 7(7)    | 23(8)  |
| N(0AA) | 70(8)   | 41(7)  | 121(13) | 4(6)   | 51(8)   | -7(8)  |
| C(5)   | 34(6)   | 42(7)  | 34(7)   | 9(5)   | 1(5)    | 4(5)   |
| C(6)   | 44(7)   | 52(8)  | 53(8)   | -11(6) | 21(6)   | -2(6)  |
| N(1)   | 41(5)   | 26(5)  | 28(5)   | 8(4)   | 8(4)    | -10(4) |
| N(2AA) | 78(8)   | 34(6)  | 20(5)   | -10(5) | 2(5)    | 0(4)   |
| C(3)   | 63(8)   | 21(6)  | 50(8)   | -13(6) | -1(6)   | -7(6)  |
| C(5AA) | 57(12)  | 51(11) | 43(10)  | 3(11)  | -11(11) | 20(8)  |
| C(4AA) | 154(19) | 64(12) | 40(10)  | 52(13) | -27(11) | 7(8)   |
| C(6AA) | 123(12) | 25(5)  | 45(6)   | 10(6)  | 4(7)    | 9(4)   |
| C(7)   | 123(12) | 25(5)  | 45(6)   | 10(6)  | 4(7)    | 9(4)   |
| C(8)   | 123(12) | 25(5)  | 45(6)   | 10(6)  | 4(7)    | 9(4)   |
| C(9)   | 57(12)  | 51(11) | 43(10)  | 3(11)  | -11(11) | 20(8)  |
| C(10)  | 45(8)   | 28(8)  | 8(6)    | -5(6)  | -4(6)   | 1(5)   |
| C(2A)  | 38(14)  | 21(9)  | 28(8)   | 3(10)  | 3(11)   | 8(7)   |

The anisotropic displacement factor exponent takes the form:  $-2\pi^2[h^2a^*U_{11} + \dots + 2hka^*b^*U_{12}]$ .

**Table S4.** Bond lengths [Å] for (C<sub>9</sub>H<sub>15</sub>N<sub>3</sub>)ZnCl<sub>4</sub> at 150.0 K with estimated standard deviations in parentheses.

| Label         | Distances |               |           |
|---------------|-----------|---------------|-----------|
| Zn(02)-Cl(0A) | 2.264(3)  | Zn(06)-Cl(0U) | 2.217(11) |
| Zn(02)-Cl(0D) | 2.297(4)  | Zn(06)-Cl(1A) | 2.086(18) |
| Zn(02)-Cl(0J) | 2.218(4)  | Zn(06)-Cl(3)  | 2.271(13) |
| Zn(02)-Cl(0Q) | 2.301(16) | Cl(07)-Zn(8)  | 2.306(4)  |
| Zn(02)-Cl(2A) | 2.27(2)   | Cl(08)-Zn(8)  | 2.287(3)  |
| Zn(03)-Cl(0C) | 2.294(4)  | Cl(09)-Zn(8)  | 2.242(4)  |
| Zn(03)-Cl(0K) | 2.217(5)  | Cl(0B)-Zn(8)  | 2.279(4)  |
| Zn(03)-Cl(0L) | 2.295(4)  | Cl(0E)-Zn(0A) | 2.297(13) |
| Zn(03)-Cl(0R) | 2.303(4)  | Cl(0F)-Zn(2)  | 2.260(16) |
| Zn(04)-Cl(0F) | 2.237(10) | Cl(0G)-Zn(2)  | 2.522(12) |
| Zn(04)-Cl(0G) | 2.237(8)  | Cl(0H)-Zn(0A) | 2.069(12) |
| Zn(04)-Cl(0I) | 2.403(9)  | Cl(0I)-Zn(2)  | 2.034(14) |
| Zn(04)-Cl(0O) | 2.329(10) | Cl(0M)-Zn(0A) | 2.276(12) |
| Zn(04)-Cl(1)  | 2.205(13) | Cl(0N)-Zn(1)  | 1.969(11) |
| Zn(04)-Cl(2)  | 2.27(2)   | Cl(0O)-Cl(1)  | 0.69(5)   |
| Zn(05)-Cl(0E) | 2.176(17) | Cl(0O)-Zn(2)  | 2.527(16) |

|               |           |               |           |
|---------------|-----------|---------------|-----------|
| Zn(05)-Cl(0H) | 2.459(11) | Cl(0P)-Zn(0A) | 2.394(13) |
| Zn(05)-Cl(0M) | 2.250(15) | Cl(0S)-Zn(1)  | 2.405(17) |
| Zn(05)-Cl(0P) | 2.157(16) | Cl(0S)-Cl(1A) | 0.636(13) |
| Zn(06)-Cl(0N) | 2.407(11) | Cl(0T)-Zn(1)  | 2.25(2)   |
| Zn(06)-Cl(0S) | 2.213(13) | Cl(0T)-Cl(3)  | 0.646(12) |
| Zn(06)-Cl(0T) | 2.140(17) | Cl(0U)-Zn(1)  | 2.328(13) |

**Table S5.** Bond angles [°] for (C<sub>9</sub>H<sub>15</sub>N<sub>3</sub>)ZnCl<sub>4</sub> at 150.0 K with estimated standard deviations in parentheses.

| Label                | Angles     | Label                | Angles     |
|----------------------|------------|----------------------|------------|
| Cl(0A)-Zn(02)-Cl(0D) | 108.97(14) | Cl(1)-Cl(0O)-Zn(2)   | 63.3(14)   |
| Cl(0A)-Zn(02)-Cl(0Q) | 110.3(5)   | Zn(05)-Cl(0P)-Zn(0A) | 8.4(5)     |
| Cl(0A)-Zn(02)-Cl(2A) | 106.2(6)   | Zn(06)-Cl(0S)-Zn(1)  | 9.8(4)     |
| Cl(0D)-Zn(02)-Cl(0Q) | 99.6(4)    | Cl(1A)-Cl(0S)-Zn(06) | 70.2(16)   |
| Cl(0J)-Zn(02)-Cl(0A) | 114.40(16) | Cl(1A)-Cl(0S)-Zn(1)  | 64.2(16)   |
| Cl(0J)-Zn(02)-Cl(0D) | 110.81(17) | Zn(06)-Cl(0T)-Zn(1)  | 11.1(4)    |
| Cl(0J)-Zn(02)-Cl(0Q) | 111.7(5)   | Cl(3)-Cl(0T)-Zn(06)  | 93.3(16)   |
| Cl(0J)-Zn(02)-Cl(2A) | 104.4(5)   | Cl(3)-Cl(0T)-Zn(1)   | 100.9(17)  |
| Cl(2A)-Zn(02)-Cl(0D) | 111.9(4)   | Zn(06)-Cl(0U)-Zn(1)  | 10.7(4)    |
| Cl(2A)-Zn(02)-Cl(0Q) | 12.4(4)    | Zn(04)-Cl(1)-Zn(2)   | 10.4(2)    |
| Cl(0C)-Zn(03)-Cl(0L) | 108.88(16) | Cl(0O)-Cl(1)-Zn(04)  | 92(2)      |
| Cl(0C)-Zn(03)-Cl(0R) | 107.78(16) | Cl(0O)-Cl(1)-Zn(2)   | 101(2)     |
| Cl(0K)-Zn(03)-Cl(0C) | 112.61(16) | Cl(08)-Zn(8)-Cl(07)  | 108.80(14) |
| Cl(0K)-Zn(03)-Cl(0L) | 110.47(16) | Cl(09)-Zn(8)-Cl(07)  | 109.79(15) |
| Cl(0K)-Zn(03)-Cl(0R) | 113.10(18) | Cl(09)-Zn(8)-Cl(08)  | 112.30(14) |
| Cl(0L)-Zn(03)-Cl(0R) | 103.54(17) | Cl(09)-Zn(8)-Cl(0B)  | 113.59(17) |
| Cl(0F)-Zn(04)-Cl(0G) | 112.9(4)   | Cl(0B)-Zn(8)-Cl(07)  | 106.53(16) |
| Cl(0F)-Zn(04)-Cl(0I) | 112.6(6)   | Cl(0B)-Zn(8)-Cl(08)  | 105.53(14) |
| Cl(0F)-Zn(04)-Cl(0O) | 111.1(5)   | Cl(0F)-Zn(2)-Cl(0G)  | 102.3(5)   |
| Cl(0F)-Zn(04)-Cl(2)  | 12.2(5)    | Cl(0F)-Zn(2)-Cl(0O)  | 103.5(7)   |
| Cl(0G)-Zn(04)-Cl(0I) | 108.1(2)   | Cl(0F)-Zn(2)-Cl(1)   | 101.1(8)   |
| Cl(0G)-Zn(04)-Cl(0O) | 102.1(5)   | Cl(0G)-Zn(2)-Cl(0O)  | 89.4(5)    |
| Cl(0G)-Zn(04)-Cl(2)  | 114.0(7)   | Cl(0I)-Zn(2)-Cl(0F)  | 128.0(7)   |
| Cl(0O)-Zn(04)-Cl(0I) | 109.6(4)   | Cl(0I)-Zn(2)-Cl(0G)  | 110.6(5)   |
| Cl(1)-Zn(04)-Cl(0F)  | 104.9(10)  | Cl(0I)-Zn(2)-Cl(0O)  | 115.6(6)   |
| Cl(1)-Zn(04)-Cl(0G)  | 118.8(18)  | Cl(0I)-Zn(2)-Cl(1)   | 107.7(10)  |
| Cl(1)-Zn(04)-Cl(0I)  | 98.9(11)   | Cl(0I)-Zn(2)-Cl(2)   | 116.5(9)   |
| Cl(1)-Zn(04)-Cl(0O)  | 17.1(13)   | Cl(1)-Zn(2)-Cl(0G)   | 104.8(17)  |

|                      |           |                      |           |
|----------------------|-----------|----------------------|-----------|
| Cl(1)-Zn(04)-Cl(2)   | 112.8(13) | Cl(1)-Zn(2)-Cl(0O)   | 15.4(13)  |
| Cl(2)-Zn(04)-Cl(0I)  | 101.4(7)  | Cl(2)-Zn(2)-Cl(0F)   | 12.3(5)   |
| Cl(2)-Zn(04)-Cl(0O)  | 121.3(8)  | Cl(2)-Zn(2)-Cl(0G)   | 105.6(8)  |
| Cl(0E)-Zn(05)-Cl(0H) | 108.1(6)  | Cl(2)-Zn(2)-Cl(0O)   | 115.1(9)  |
| Cl(0E)-Zn(05)-Cl(0M) | 114.7(7)  | Cl(2)-Zn(2)-Cl(1)    | 111.0(12) |
| Cl(0M)-Zn(05)-Cl(0H) | 99.2(5)   | Cl(0N)-Zn(1)-Cl(0S)  | 121.8(7)  |
| Cl(0P)-Zn(05)-Cl(0E) | 115.2(6)  | Cl(0N)-Zn(1)-Cl(0T)  | 108.6(8)  |
| Cl(0P)-Zn(05)-Cl(0H) | 105.5(6)  | Cl(0N)-Zn(1)-Cl(0U)  | 109.8(6)  |
| Cl(0P)-Zn(05)-Cl(0M) | 112.3(7)  | Cl(0N)-Zn(1)-Cl(1A)  | 112.3(7)  |
| Cl(0S)-Zn(06)-Cl(0N) | 111.8(5)  | Cl(0N)-Zn(1)-Cl(3)   | 118.1(7)  |
| Cl(0S)-Zn(06)-Cl(0U) | 122.3(6)  | Cl(0S)-Zn(1)-Cl(3)   | 97.3(5)   |
| Cl(0S)-Zn(06)-Cl(3)  | 108.8(5)  | Cl(0T)-Zn(1)-Cl(0S)  | 94.1(6)   |
| Cl(0T)-Zn(06)-Cl(0N) | 97.7(6)   | Cl(0T)-Zn(1)-Cl(0U)  | 111.3(7)  |
| Cl(0T)-Zn(06)-Cl(0S) | 102.9(6)  | Cl(0T)-Zn(1)-Cl(3)   | 15.0(3)   |
| Cl(0T)-Zn(06)-Cl(0U) | 120.2(7)  | Cl(0U)-Zn(1)-Cl(0S)  | 110.2(6)  |
| Cl(0T)-Zn(06)-Cl(3)  | 16.5(3)   | Cl(0U)-Zn(1)-Cl(3)   | 96.5(5)   |
| Cl(0U)-Zn(06)-Cl(0N) | 99.1(4)   | Cl(1A)-Zn(1)-Cl(0S)  | 15.1(4)   |
| Cl(0U)-Zn(06)-Cl(3)  | 105.3(5)  | Cl(1A)-Zn(1)-Cl(0T)  | 108.9(8)  |
| Cl(1A)-Zn(06)-Cl(0N) | 100.8(6)  | Cl(1A)-Zn(1)-Cl(0U)  | 106.0(7)  |
| Cl(1A)-Zn(06)-Cl(0S) | 16.7(4)   | Cl(1A)-Zn(1)-Cl(3)   | 112.3(7)  |
| Cl(1A)-Zn(06)-Cl(0T) | 117.9(7)  | Cl(0E)-Zn(0A)-Cl(0P) | 102.5(5)  |
| Cl(1A)-Zn(06)-Cl(0U) | 114.5(7)  | Cl(0H)-Zn(0A)-Cl(0E) | 118.5(6)  |
| Cl(1A)-Zn(06)-Cl(3)  | 125.3(7)  | Cl(0H)-Zn(0A)-Cl(0M) | 111.3(5)  |
| Cl(3)-Zn(06)-Cl(0N)  | 108.6(5)  | Cl(0H)-Zn(0A)-Cl(0P) | 110.8(5)  |
| Zn(05)-Cl(0E)-Zn(0A) | 10.0(4)   | Cl(0M)-Zn(0A)-Cl(0E) | 109.2(5)  |
| Zn(04)-Cl(0F)-Zn(2)  | 10.7(2)   | Cl(0M)-Zn(0A)-Cl(0P) | 103.2(5)  |
| Zn(04)-Cl(0G)-Zn(2)  | 7.5(3)    | Zn(06)-Cl(1A)-Zn(1)  | 11.3(3)   |
| Zn(0A)-Cl(0H)-Zn(05) | 3.2(7)    | Cl(0S)-Cl(1A)-Zn(06) | 93.1(17)  |
| Zn(2)-Cl(0I)-Zn(04)  | 5.2(4)    | Cl(0S)-Cl(1A)-Zn(1)  | 100.8(17) |
| Zn(05)-Cl(0M)-Zn(0A) | 10.3(3)   | Zn(2)-Cl(2)-Zn(04)   | 10.7(2)   |
| Zn(1)-Cl(0N)-Zn(06)  | 0.2(8)    | Zn(06)-Cl(3)-Zn(1)   | 9.7(4)    |
| Zn(04)-Cl(0O)-Zn(2)  | 8.8(2)    | Cl(0T)-Cl(3)-Zn(06)  | 70.2(15)  |
| Cl(1)-Cl(0O)-Zn(04)  | 71.2(14)  | Cl(0T)-Cl(3)-Zn(1)   | 64.1(15)  |

**Table S6.** The manganese content for the metal components in the raw material and

that obtained from EDS experiment.

| Raw Material (Mn%)  |         | 1    | 5    | 10   | 20  | 30   | 40  | 50   |
|---------------------|---------|------|------|------|-----|------|-----|------|
| Experiment<br>(Mn%) | first   | 4.7  | 9.2  | 3.1  | 3.6 | 0.21 | 7   | 11.3 |
|                     | second  | 0    | 1.2  | 0    | 11  | 14.6 | 4.1 | 6.1  |
|                     | third   | 0.39 | 0    | 0    | 4.9 | 0    | 8.1 | 14.4 |
|                     | average | 1.69 | 3.47 | 1.03 | 6.5 | 4.94 | 6.4 | 10.6 |

**Table S7.** CIE coordinates of  $(\text{C}_9\text{H}_{15}\text{N}_3)\text{ZnCl}_4:\text{Mn}^{2+}$  with different  $\text{Mn}^{2+}$  feed ratio (0~50%).

| $\text{Mn}^{2+}$<br>(%) | 0                       | 1                       | 5                       | 10                      | 20                      | 30                     | 40                      | 50                      |
|-------------------------|-------------------------|-------------------------|-------------------------|-------------------------|-------------------------|------------------------|-------------------------|-------------------------|
| CIE                     | (0.162<br>7,0.09<br>72) | (0.173<br>6,0.19<br>86) | (0.192<br>4,0.36<br>86) | (0.197<br>9,0.40<br>98) | (0.206<br>7,0.48<br>44) | (0.211<br>9,0.52<br>6) | (0.215<br>6,0.55<br>64) | (0.218<br>7,0.56<br>47) |

**Table S8.** CIE coordinates of  $(\text{C}_9\text{H}_{15}\text{N}_3)\text{ZnCl}_4:5\%\text{Mn}^{2+}$  in the temperature range of 110 to 290 K

| Temperature<br>(K) | 110 K               | 140 K               | 170 K               | 200 K              | 230 K               | 260 K               | 290 K               |
|--------------------|---------------------|---------------------|---------------------|--------------------|---------------------|---------------------|---------------------|
| CIE                | (0.1885,<br>0.3067) | (0.1897,<br>0.3157) | (0.1921,<br>0.3257) | (0.1967,<br>0.348) | (0.1999,<br>0.3761) | (0.2028,<br>0.4052) | (0.2053,<br>0.4208) |

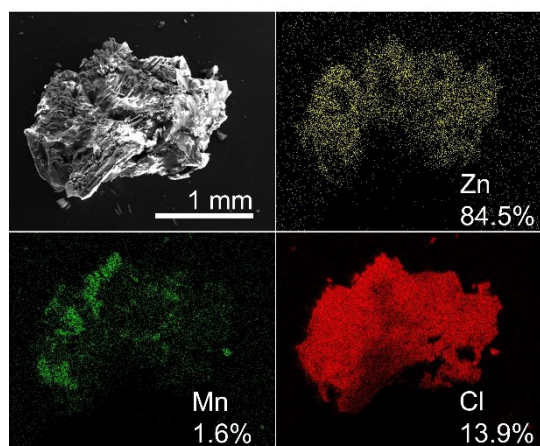

**Figure S1.** SEM images of  $(\text{C}_9\text{H}_{15}\text{N}_3)_2\text{ZnCl}_4: \text{Mn}^{2+}$  (50%) and element mapping images of Zn, Mn, and Cl.

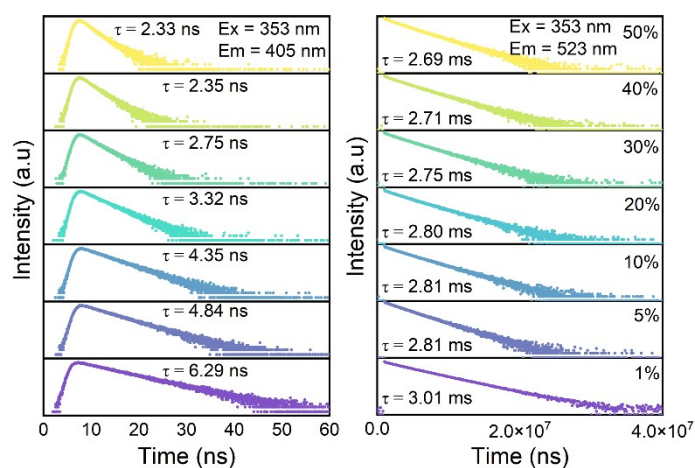

**Figure S2.** The fluorescence decay lifetime of  $(\text{C}_9\text{H}_{15}\text{N}_3)_2\text{ZnCl}_4: \text{Mn}^{2+}$  with different  $\text{Mn}^{2+}$  feed ratio (1%  $\sim$  50%) recorded at 405 and 523 nm at room temperature.

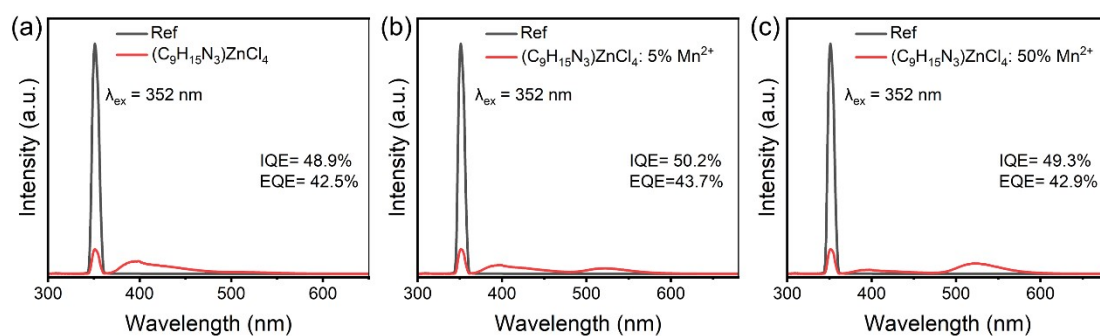

**Figure S3.** The PL spectra of (a)  $(\text{C}_9\text{H}_{15}\text{N}_3)_2\text{ZnCl}_4$ , (b)  $(\text{C}_9\text{H}_{15}\text{N}_3)_2\text{ZnCl}_4: 5\%\text{Mn}^{2+}$  and (c)  $(\text{C}_9\text{H}_{15}\text{N}_3)_2\text{ZnCl}_4: 50\%\text{Mn}^{2+}$  with  $\text{Al}_2\text{O}_3$  as reference.

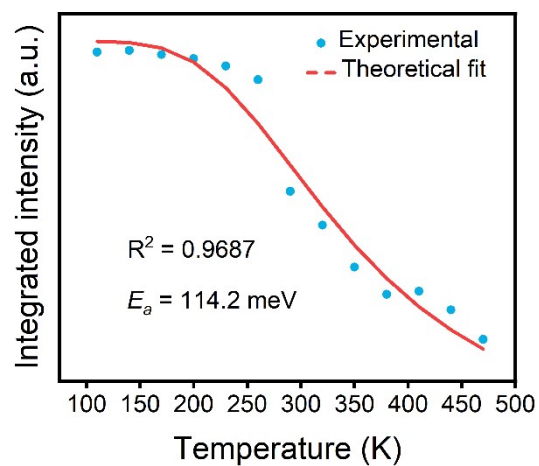

**Figure S4.** The integrated PL intensity of  $(\text{C}_9\text{H}_{15}\text{N}_3)\text{ZnCl}_4$  in the range of 110 ~ 470 K as a function of temperature.
